# Supplementary material for: Origin of dispersive line shapes in plasmon-enhanced stimulated Raman scattering microscopy
Source: publisher site journal article supplement (doi:10.1515/nanoph-2020-0313), 2020-07-27
Supplement: Supplementary file 1 [file nanoph-2020-0313_suppl.docx]

**Supporting information: Origin of dispersive line shapes in plasmon-enhanced stimulated Raman scattering microscopy**

Cheng Zong1, Ji-Xin Cheng1,2*

1. Department of Electrical and Computer Engineering, Boston University, Boston, Massachusetts 02215, USA.

2. Department of Biomedical Engineering, Photonics Center, Boston University, Boston, Massachusetts, 02215, USA.

*Corresponding author: email: jxcheng@bu.edu

**SI1. The resonant and nonresonant nonlinear susceptibility in the spectral domain.**

**Figure S1.** The stimulated resonant and nonresonant nonlinear susceptibility in the spectral domain. The real part (black) and imaginary part (red) of resonant susceptibility (). The nonresonant part (): blue. The half width at half maximum of Raman line is 5 cm-1. Here, we note that is a Lorentzian line shape and can be rewritten as a Fano-line shape in which the Fano parameter is 1 as following:

(S1)

**SI2 Delay time traces obtained from Au NPs substrate with/without adenine adsorption**

**Figure S2**. Delay time traces obtained from the adenine adsorbed Au NPs substrate and the Au NPs substrate without adenine adsorption.

**SI3 SRL and SRG spectra and images of solid adenine**


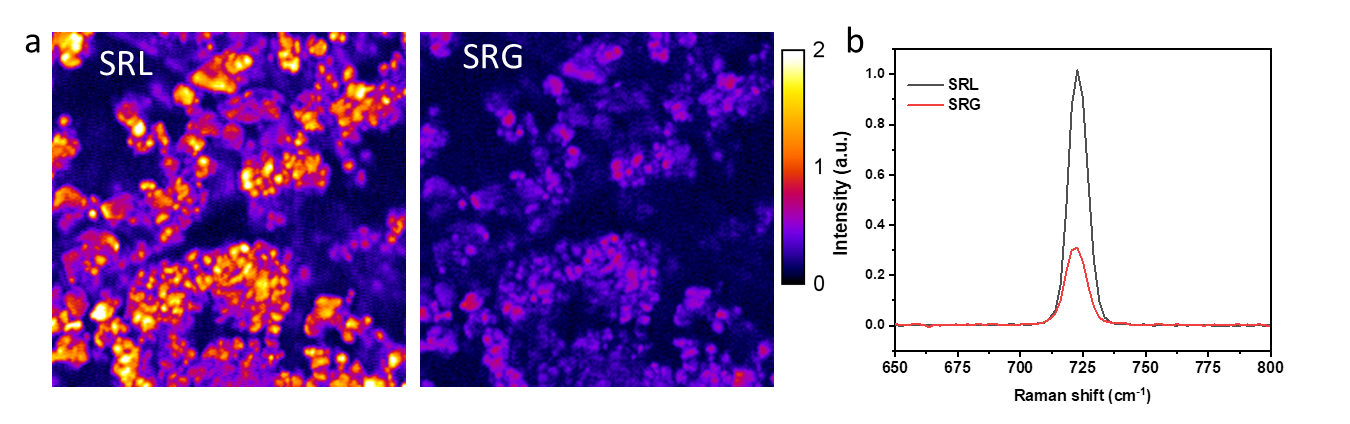


**Figure S3** a) The SRL and SRG images of adenine. b) The SRL and SRG spectra of adenine.

**SI4. Fano-like fitting results of PESRS spectra from adenine adsorbed on Au NPs**

**Table S1** Results from the Fano-like fitting of the PESRL and PESRG data from adenine

|  | **x0 (cm-1)** | ***Γ* (cm-1)** | **A** |
| --- | --- | --- | --- |
|  | 732.9 | 10.3 | 0.059 |
| **PESRL** | 732.6 | 9.6 | 0.0732 |
|  | 732.2 | 9.3 | 0.0615 |
|  | 733.0 | 10.3 | 0.0102 |
| **PESRG** | 733.1 | 9.7 | 0.0143 |
|  | 732.8 | 10.9 | 0.0105 |

The fitting function is shown as following:. Here, A is the amplitude of the peak, x0 is the center frequency of vibrational feature, *Γ* is the line width. *q* is the Fano asymmetry parameter. The q= −1.7 and q = 2 are used to fit the PESRL and PESRG data, respectively.
